# Supplementary material
Source: publisher site journal article supplement (https://www.spandidos-publications.com/1016/downloadSupplementary)

Figure S1. Scutellarein treatment inhibited cell viability and promoted cell apoptosis in colon cancer cells (CL-40, SW480 and T84). Effect of scutellarein treatment on the expression levels of cleaved caspase3/7 and total caspase3/7 determined by a western blot assay in (A) CL-40, (B) SW480 and (C) T84 cells. (D) Effect of scutellarein treatment on cell clone formation was determined using a clone formation assay. \*P<0.05 vs. 0  $\mu$ M group.

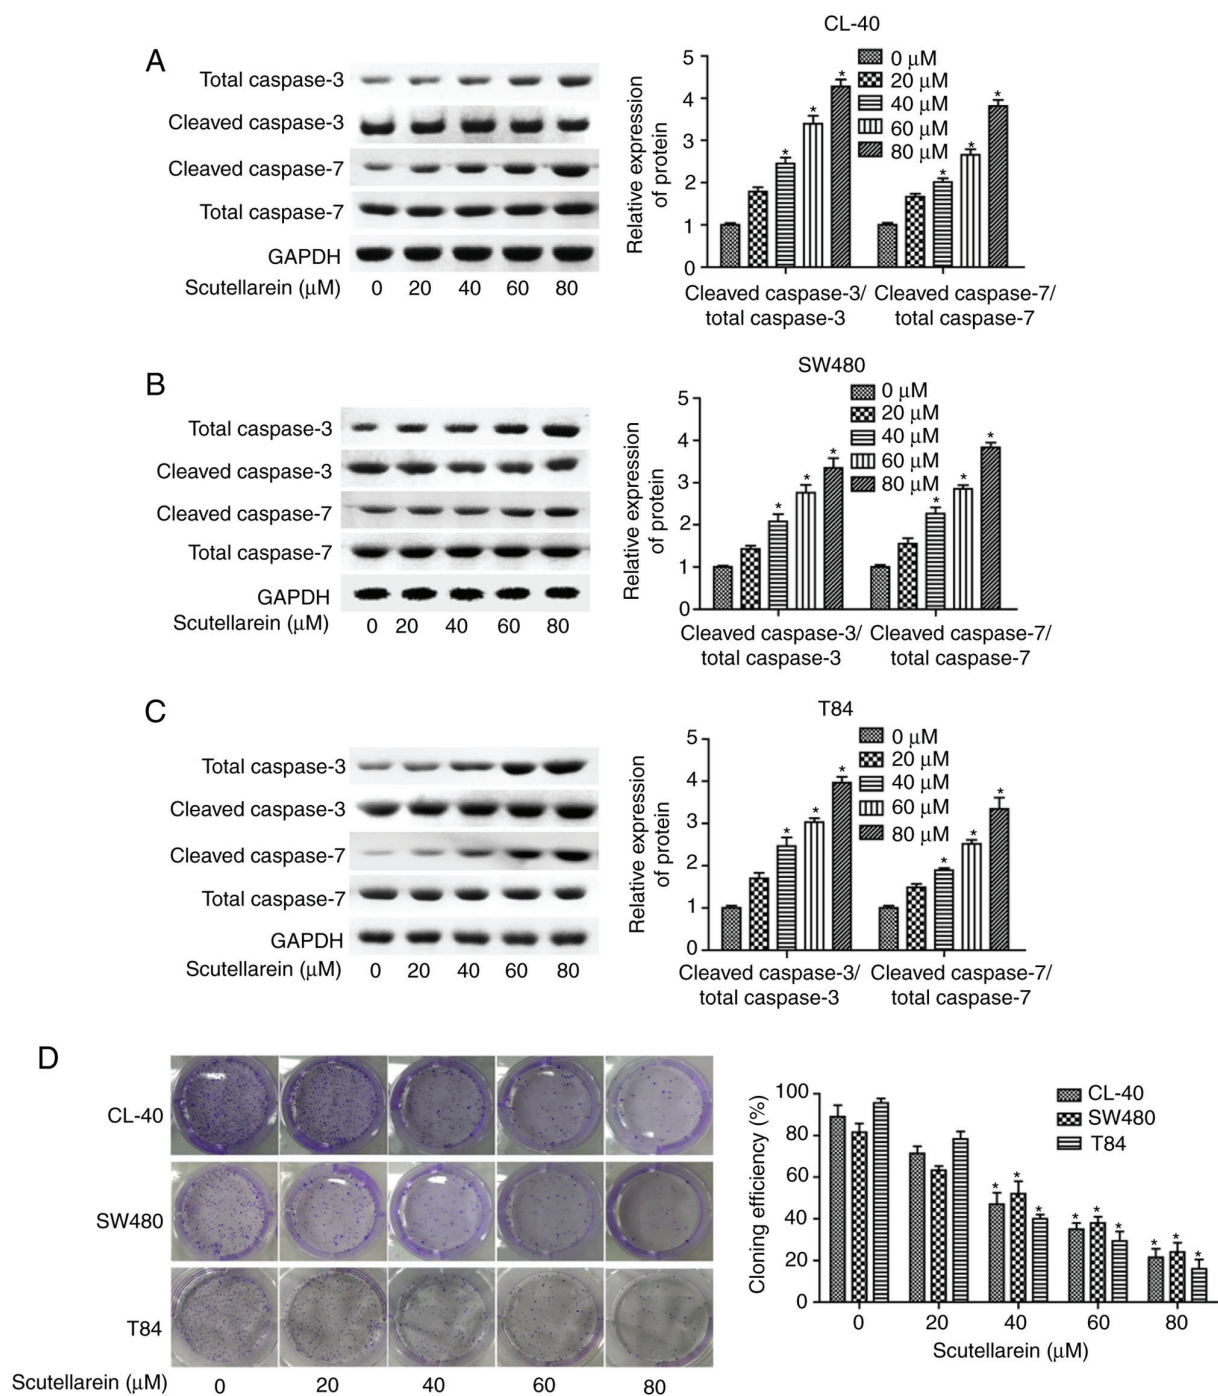

Figure S2. Evaluation of the effects of scutellarein/RAGE on the activation of p-p65, PKC and VEGF signaling. Expression levels of p-p65, p65, VEGF and PKC proteins were assessed using a western blot assay once (A) SW480 and (B) T84 cells were treated with scutellarein, scutellarein+OE-RAGE or scutellarein+sh-RAGE. n=3. \*P<0.05 vs. the control group; #P<0.05 vs. the scutellarein group. p-, phosphorylated; PKC, protein kinase C; VEGF, vascular endothelial growth factor; RAGE, receptor for advanced glycation end products; OE, overexpression; sh-, short hairpin RNA.

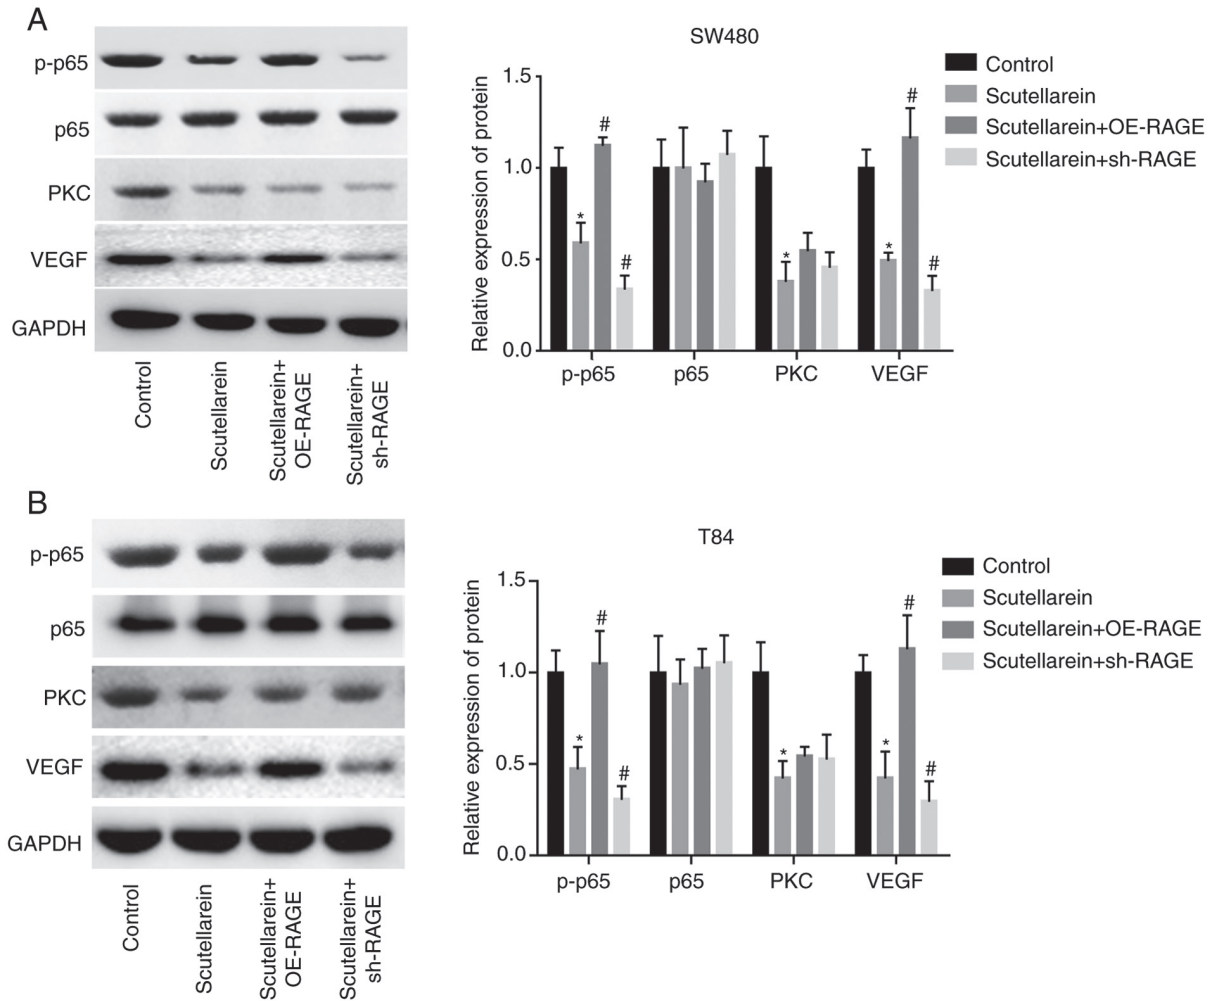

Figure S3. Evaluation of the effects of scutellarein/CDC4 on the activation of p-p65, PKC and VEGF signaling. Expression levels of p-p65, p65, VEGF and PKC proteins were tested using a western blot assay once (A) SW480 and (B) T84 cells were treated with scutellarein or scutellarein+sh-CDC4. n=3. \*P<0.05 vs. the control group; #P<0.05 vs. the scutellarein group. CDC4, cell division control protein 4; p-, phosphorylated; PKC, protein kinase C; VEGF, vascular endothelial growth factor; sh-, short hairpin RNA.

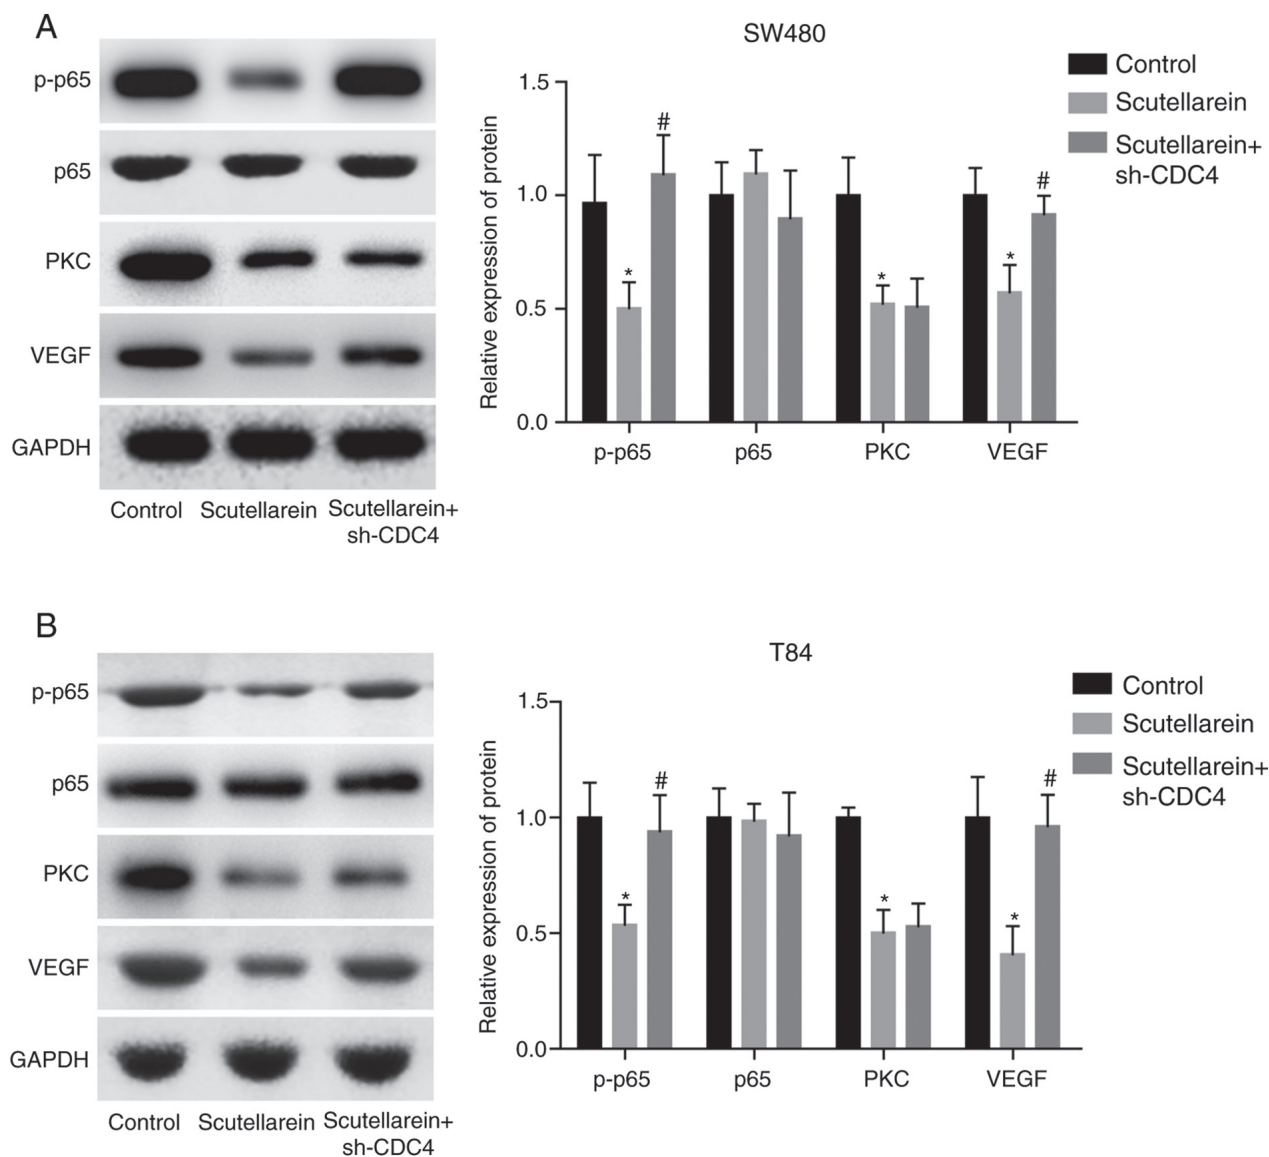

Supplement: Supplementary file 1 [file downloadSupplementary]
